# Supplementary material for: Bacillus subtilis polynucleotide phosphorylase 3′-to-5′ DNase activity is involved in DNA repair
Source: PubMed Central journal article supplement — Nucleic Acids Res. 2009 May 11;37(12):4157–69. doi: 10.1093/nar/gkp314 (PMC2709576; doi:10.1093/nar/gkp314), 2009-05-11
Supplement: gkp314_1.pdf [file gkp314_1.pdf]

### *Annex 1. Proteins present in conventionally purified RecN protein*

The proteins present in the conventionally purified RecN sample, the  $M_R = 520,000$  peak, were separated by preparative two-dimensional (2D) polyacrylamide gel electrophoresis (PAGE) using a linear pH gradient in the 3-10 pH range. The six protein spots were excised manually and the gel plugs were washed with 50 mM ammonium bicarbonate and treated with acetonitrile, before reduction with 10 mM DTT in 25 mM ammonium bicarbonate and alkylation with 55 mM iodoacetamide in 50 mM ammonium bicarbonate, as described (1). Proteins were digested with modified porcine trypsin (sequencing grade; Promega, Madison WI) at a final concentration of 15 ng/ml in 25 mM ammonium bicarbonate for 4 hrs at 37° C. Peptides were eluted from gel pieces with 0.5% trifluoroacetic acid in water for 30 min at 25° C, and the resulting peptides were analyzed using a Bruker Reflex IV MALDI-TOF mass spectrometer (Bruker Daltonics, Bremen, Germany) using FlexControl 1.1 software and then processed by Xtof 5.1.1 software, which analyzes raw data. Each spectrum was calibrated internally with two trypsin autolysis reference ions, specifically 842.510 and 2211.105 Da peptides, to reach a typical mass measurement accuracy of  $\pm 30$  ppm in the 800-3000 m/z range. For protein identification, tryptic peptide masses were transferred to the BioTools 2.0 interface, provided by Bruker Daltonics, and searched against the non-redundant NCBI database using Mascot software ([www.matrixscience.com](http://www.matrixscience.com); Matrix Science, London, UK). In all protein identifications, the probability Mowse scores were greater than the minimum score fixed as significant with a *p*-value less than 0.05.

The conventionally purified RecN sample, after FPLC purification, contained *circa* 1.2 % GroEL, 0.3 % AhpC, 0.3% PncB, 0.2 % PNPase and 0.1 % YqfO. Except for *pncB*, which is essential only in the presence of the *yrxA* gene product (see 2), the genes coding for the other polypeptides are not essential (data not shown). AhpC, which is the small subunit of the alkyl hydroperoxide reductase and has an estimated molecular mass of 20.4 kDa, migrated as a 19 kDa protein with a pI of 4.1 (Table 1). GroEL, a multisubunit chaperonin with  $M_R = \sim 840,000$  and a subunit estimated molecular mass of 57.2 kDa, migrated as a 60 kDa protein with a pI of 4.6 (Table 1). PNPase, a multisubunit polynucleotide phosphorylase complex with  $M_R = \sim 235,000$  and an estimated subunit molecular mass of 77.2 kDa, migrated as a 75 kDa protein with a pI of 4.9, similar to RecN. PncB (previously termed YueK), which is nicotinic acid phosphoribosyltransferase having an estimated molecular mass of 56.0 kDa, migrated as a 44 kDa protein with a pI of 5.1 (Table 1). A peptide fingerprint revealed that a truncated form of PncB was present in the RecN sample. YqfO, a multisubunit protein of unknown function with  $M_R = \sim 120,000$  and an estimated molecular mass of 40.7 kDa, migrated as a 40 kDa protein with a pI of 5.3 (Table 1). Previously it was reported that the GroEL AhpC, PncB, PNPase, YqfO and RecN proteins were involved in nucleic acid metabolism or played a certain role with enzymes involved in nucleic acid metabolism (2-8).

### *Annex 2. Are PNPase, GroEL, AhpC, PncB and YqfO simply “contaminants” in the RecN sample?*

*B. subtilis* GroEL genuinely interacts with AhpC (9), and GroEL<sub>Eco</sub> interacts directly with PNPase in multiprotein complexes that are involved in mRNA processing and degradation (see 6,10). AhpC, is the founding member of the large AhpC/TSA family of peroxidases (11), and participates actively in DNA repair by reducing peroxides to their corresponding alcohols (5). PncB, the nicotinic acid phosphoribosyltransferase, is involved in the niacin salvage pathway and the metabolism of NAD (see 2), with NAD playing important roles in cellular metabolism. YqfO is a member of the widespread Nif3 family of proteins, although the precise function of this family still remains elusive.

We consider it unlikely that RecN co-purifies fortuitously with PNPase. Previously it was shown that PNPase co-purifies with GroEL (10). Although GroEL constituted >1% of the

RecN preparation, other proteins that are involved in nucleic acid metabolism with an acid pI and that physically interact with the GroEL protein (e.g., Enolase [pI 4.5], DnaK [pI 4.8], AtpD [pI 4.8] or RecA [pI 4.9]) (9) were not present in the RecN sample (Supplemental Fig. 1). We cannot rule out the possibility that GroEL interacts with RecN. We have found that, by fully removing GroEL from the RecN sample, a decrease (~ 2-fold) in the ssDNA-dependent ATPase activity of the RecN protein stored at 4°C for one week was observed (data not shown). At present only 21 % of total proteins that interact with GroEL have been identified (9). We consider it unlikely that RecN was able to co-purify fortuitously with any protein(s) induced under stress conditions, because the *B. subtilis* strain (BG214) used for *recN* over-expression is deficient in  $\sigma^B$  (*sigB37*), and under this condition low levels of AhpC expression were expected during exponential growth (see 4). Other than PNPase and GroEL, proteins found in the degradosome-like complex in other organisms, such as enolase and DnaK (see 6), were not present in the RecN sample.

Table S1. Bacterial strains used in this study

| Strain <sup>a</sup>  | Doubling Time (min) <sup>b</sup> | Relevant genotype                                    | Source or reference |
|----------------------|----------------------------------|------------------------------------------------------|---------------------|
| BG214                | 29.4                             | <i>trpC2 metB5 amyE sigB37 xre1 attSPβ attICEBs1</i> | (12)                |
| BG993                | 38.2                             | + $\Delta$ <i>pnpA</i>                               | This work           |
| BG190                | 32.3                             | + $\Delta$ <i>recA</i>                               | (13)                |
| BG439 ( $\alpha$ )   | 32.1                             | + $\Delta$ <i>recO</i>                               | (14)                |
| BG125 ( $\beta$ )    | 34.9                             | + <i>addA5</i>                                       | (12)                |
| BG281 ( $\delta$ )   | 35.0                             | + $\Delta$ <i>recN</i>                               | (15)                |
| BG623 ( $\epsilon$ ) | 31.0                             | + $\Delta$ <i>recU</i>                               | This work           |
| BG705 ( $\zeta$ )    | 30.1                             | + $\Delta$ <i>recJ</i>                               | (16)                |
| BG713 ( $\eta$ )     | 34.5                             | + $\Delta$ <i>recG</i>                               | (17)                |
| BG995                | 48.3                             | + $\Delta$ <i>recA</i> $\Delta$ <i>pnpA</i>          | This work           |
| BG997                | 46.6                             | + $\Delta$ <i>recO</i> $\Delta$ <i>pnpA</i>          | This work           |
| BG1007               | 48.1                             | + <i>addA5</i> $\Delta$ <i>pnpA</i>                  | This work           |
| BG1013               | 50.0                             | + $\Delta$ <i>recN</i> $\Delta$ <i>pnpA</i>          | This work           |
| BG1009               | 44.4                             | + $\Delta$ <i>recU</i> $\Delta$ <i>pnpA</i>          | This work           |
| BG1003               | 47.9                             | + $\Delta$ <i>recJ</i> $\Delta$ <i>pnpA</i>          | This work           |
| BG1005               | 47.0                             | + $\Delta$ <i>recG</i> $\Delta$ <i>pnpA</i>          | This work           |
| BG809                | 31.0                             | + $\Delta$ <i>ku</i> ( <i>ykoV</i> )                 | (18)                |
| BG849                | 49.7                             | + $\Delta$ <i>ku</i> $\Delta$ <i>recA</i>            | (18)                |
| BG1011               | 48.7                             | + $\Delta$ <i>ku</i> $\Delta$ <i>pnpA</i>            | This work           |
| BG1047               | ND                               | + $\Delta$ <i>lexA</i>                               | This work           |
| BG1048               | ND                               | + $\Delta$ <i>lexA</i> $\Delta$ <i>pnpA</i>          | This work           |

<sup>a</sup> Parentheses denote the epistatic group in which the gene is classified, All strains were isogenic with the wt control (BG214), and the relevant genotype of the strains is indicated.

<sup>b</sup> Values represent the average from three independent experiments in which doubling times were measured for strains grown in LB broth at 37° C. ND, not done

Table S2. Expression of RecA protein in  $\Delta pnpA$  cells

| Strain                    | Level of induced RecA <sup>a</sup> |                       |
|---------------------------|------------------------------------|-----------------------|
|                           | - MMC                              | + MMC                 |
| wt                        | ~ 4,100 (5.6 $\mu$ M)              | ~ 26,200 (35 $\mu$ M) |
| $\Delta pnpA$             | ~ 4,000                            | ~ 25,900              |
| $\Delta recA$             | ND                                 | ND                    |
| $\Delta lexA$             | ~ 26,100                           | ~ 25,900              |
| $\Delta lexA \Delta pnpA$ | ~ 25,800                           | ~ 25,400              |

<sup>a</sup>Number of protein protomers based on the number of wt,  $\Delta pnpA$ ,  $\Delta recA$  and  $\Delta lexA$  exponentially growing cells or those cells after exposure to MMC (3  $\mu$ M or 1  $\mu$ g/ml) for 30 min was estimated as described (19). In parentheses is indicated the estimated *in vivo* concentration of RecA, assuming a cell volume of 1.2 femtoliters. ND, not detected.

#### References

1. Shevchenko, A., Wilm, M., Vorm, O. and Mann, M. (1996) Mass spectrometric sequencing of proteins silver-stained polyacrylamide gels. *Anal chem*, **68**, 850-858.
2. Rossolillo, P., Marinoni, I., Galli, E., Colosimo, A. and Albertini, A.M. (2005) YrxA is the transcriptional regulator that represses de novo NAD biosynthesis in *Bacillus subtilis*. *J Bacteriol*, **187**, 7155-7160.
3. Deutscher, M.P. and Reuven, N.B. (1991) Enzymatic basis for hydrolytic versus phosphorolytic mRNA degradation in *Escherichia coli* and *Bacillus subtilis*. *Proc Natl Acad Sci U S A*, **88**, 3277-3280.
4. Bsat, N., Chen, L. and Helmann, J.D. (1996) Mutation of the *Bacillus subtilis* alkyl hydroperoxide reductase (*ahpCF*) operon reveals compensatory interactions among hydrogen peroxide stress genes. *J Bacteriol*, **178**, 6579-6586.
5. Ellis, H.R. and Poole, L.B. (1997) Roles for the two cysteine residues of AhpC in catalysis of peroxide reduction by alkyl hydroperoxide reductase from *Salmonella typhimurium*. *Biochemistry*, **36**, 13349-13356.
6. Carpousis, A.J., Vanzo, N.F. and Raynal, L.C. (1999) mRNA degradation. A tale of poly(A) and multiprotein machines. *Trends Genet*, **15**, 24-28.
7. Sanchez, H. and Alonso, J.C. (2005) *Bacillus subtilis* RecN binds and protects 3'-single-stranded DNA extensions in the presence of ATP. *Nucleic Acids Res*, **33**, 2343-2350.
8. Sanchez, H., Cardenas, P.P., Yoshimura, S.H., Takeyasu, K. and Alonso, J.C. (2008) Dynamic structures of *Bacillus subtilis* RecN-DNA complexes. *Nucleic Acids Res*, **36**, 110-120.
9. Endo, A. and Kurusu, Y. (2007) Identification of *in vivo* substrates of the chaperonin GroEL from *Bacillus subtilis*. *Biosci, Biotech Biochem*, **71**, 1073-1077.
10. Ybarra, J. and Horowitz, P.M. (1996) Nucleotides reveal polynucleotide phosphorylase activity from conventionally purified GroEL. *J Biol Chem*, **271**, 25063-25066.
11. Chae, H.Z., Robison, K., Poole, L.B., Church, G., Storz, G. and Rhee, S.G. (1994) Cloning and sequencing of thiol-specific antioxidant from mammalian brain: alkyl hydroperoxide reductase and thiol-specific antioxidant define a large family of antioxidant enzymes. *Proc Natl Acad Sci U S A*, **91**, 7017-7021.
12. Alonso, J.C., Tailor, R.H. and Luder, G. (1988) Characterization of recombination-deficient mutants of *Bacillus subtilis*. *J Bacteriol*, **170**, 3001-3007.
13. Ceglowski, P., Luder, G. and Alonso, J.C. (1990) Genetic analysis of *recE* activities in *Bacillus subtilis*. *Mol Gen Genet*, **222**, 441-445.

14. Fernandez, S., Kobayashi, Y., Ogasawara, N. and Alonso, J.C. (1999) Analysis of the *Bacillus subtilis* *recO* gene: RecO forms part of the RecFLOR function. *Mol Gen Genet*, **261**, 567-573.
15. Alonso, J.C., Stiege, A.C. and Luder, G. (1993) Genetic recombination in *Bacillus subtilis* 168: effect of *recN*, *recF*, *recH* and *addAB* mutations on DNA repair and recombination. *Mol Gen Genet*, **239**, 129-136.
16. Sanchez, H., Kidane, D., Cozar, M.C., Graumann, P.L. and Alonso, J.C. (2006) Recruitment of *Bacillus subtilis* RecN to DNA double-strand breaks in the absence of DNA end processing. *J Bacteriol*, **188**, 353-360.
17. Sanchez, H., Carrasco, B., Cozar, M.C. and Alonso, J.C. (2007) *Bacillus subtilis* RecG branch migration translocase is required for DNA repair and chromosomal segregation. *Mol Microbiol*, **65**, 920-935.
18. Mascarenhas, J., Sanchez, H., Tadesse, S., Kidane, D., Krishnamurthy, M., Alonso, J.C. and Graumann, P.L. (2006) *Bacillus subtilis* SbcC protein plays an important role in DNA inter-strand cross-link repair. *BMC Mol Biol*, **7**, 20.
19. Lovett, C.M., Jr., Love, P.E., Yasbin, R.E. and Roberts, J.W. (1988) SOS-like induction in *Bacillus subtilis*: induction of the RecA protein analog and a damage-inducible operon by DNA damage in Rec<sup>+</sup> and DNA repair-deficient strains. *J Bacteriol*, **170**, 1467-1474.

## Figure Legend

**Figure S1.** Analysis of proteins present in the RecN sample prior to purification by gel filtration chromatography. The six proteins (1 to 6) were identified as: 1, RecN; 2, AhpC; 3, GroEL; 4, PNPase; 5, PncB; 6, YqfO.

**Figure S2.** Chromosomal segregation in  $\Delta pnpA$  cells. Exponentially growing cells were fixed, stained with DAPI, and analyzed by fluorescence microscopy to visualize the nucleoid. Two images are shown from each of the indicated strains. Grey arrows indicate anucleate cells and white arrows denote aberrant and misplaced nucleoids.

**Figure S3.** Survival of  $\Delta pnpA$  strains exposed to a chronic dose of  $H_2O_2$ , MMS or MMC. The strains were grown to  $OD_{560} = 0.4$  in LB medium and serially diluted ( $10^{-3}$  to  $10^{-7}$ ) and plated on LB agar containing the indicated concentration of the DNA damaging agent. The strains used are identified by their relevant genotype. – Drug, no drug added. Only the relevant drug concentration that highlight differences are shown. In *A*, cells were exposed to 1 mM  $H_2O_2$ , 2.7 mM MMS or 180 pM MMC. In *B*, cells were exposed to 0.5 (*addA5* and *addA5*  $\Delta pnpA$ ) or 0.6 ( $\Delta recN$  and  $\Delta recN$   $\Delta pnpA$ ) mM  $H_2O_2$ , 1.2 mM MMS or 90 pM MMC. In *C*, cells were exposed to 0.2 mM  $H_2O_2$ , 70  $\mu$ M MMS or 10 pM MMC.

**Figure S4.** Survival of  $\Delta pnpA$  strains exposed to an acute dose of MMS or  $H_2O_2$ . The strains were grown to  $OD_{560} = 0.4$  in LB medium and exposed to increasing concentrations of MMS (*A*, *B* and *C*) or  $H_2O_2$  (*D*, *E* and *F*) for 15 min, and serial dilutions were plated onto LB plates to measure survival rates. A given recombination-deficient strain in the  $\Delta pnpA$  context is denoted by its equivalent filled symbol. In *A* and *D* the  $\Delta recQ$   $\Delta pnpA$  and  $\Delta recJ$   $\Delta pnpA$  strains showed similar survival curves; hence, only the former strain is included. In *C* and *F*, the  $\Delta recO$   $\Delta pnpA$  and  $\Delta recR$   $\Delta pnpA$  strains showed similar survival curves; hence only the former strain is included.

**Figure S5.** Survival of the null *ku* mutation in the  $\Delta pnpA$  context. *A*, survival of cells exposed acutely to increasing drug concentrations. *B* and *C*, survival of cells exposed chronically to DNA damaging agents. In *B*, cells were exposed to 1 mM  $H_2O_2$ , 2.7 mM MMS, 200 nM 4NQO or 180 pM MMC. In *C*, cells were exposed to 0.2 mM  $H_2O_2$ , 70  $\mu$ M MMS, 7.5 nM 4NQO or 10 pM MMC.

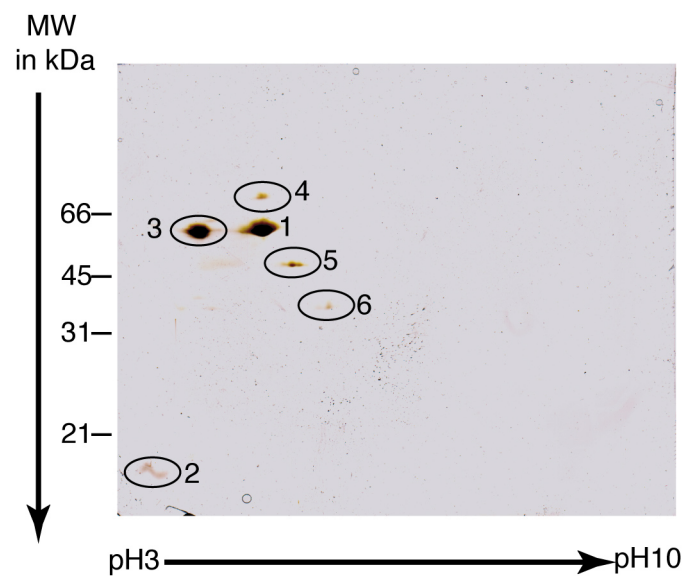

Figure S1

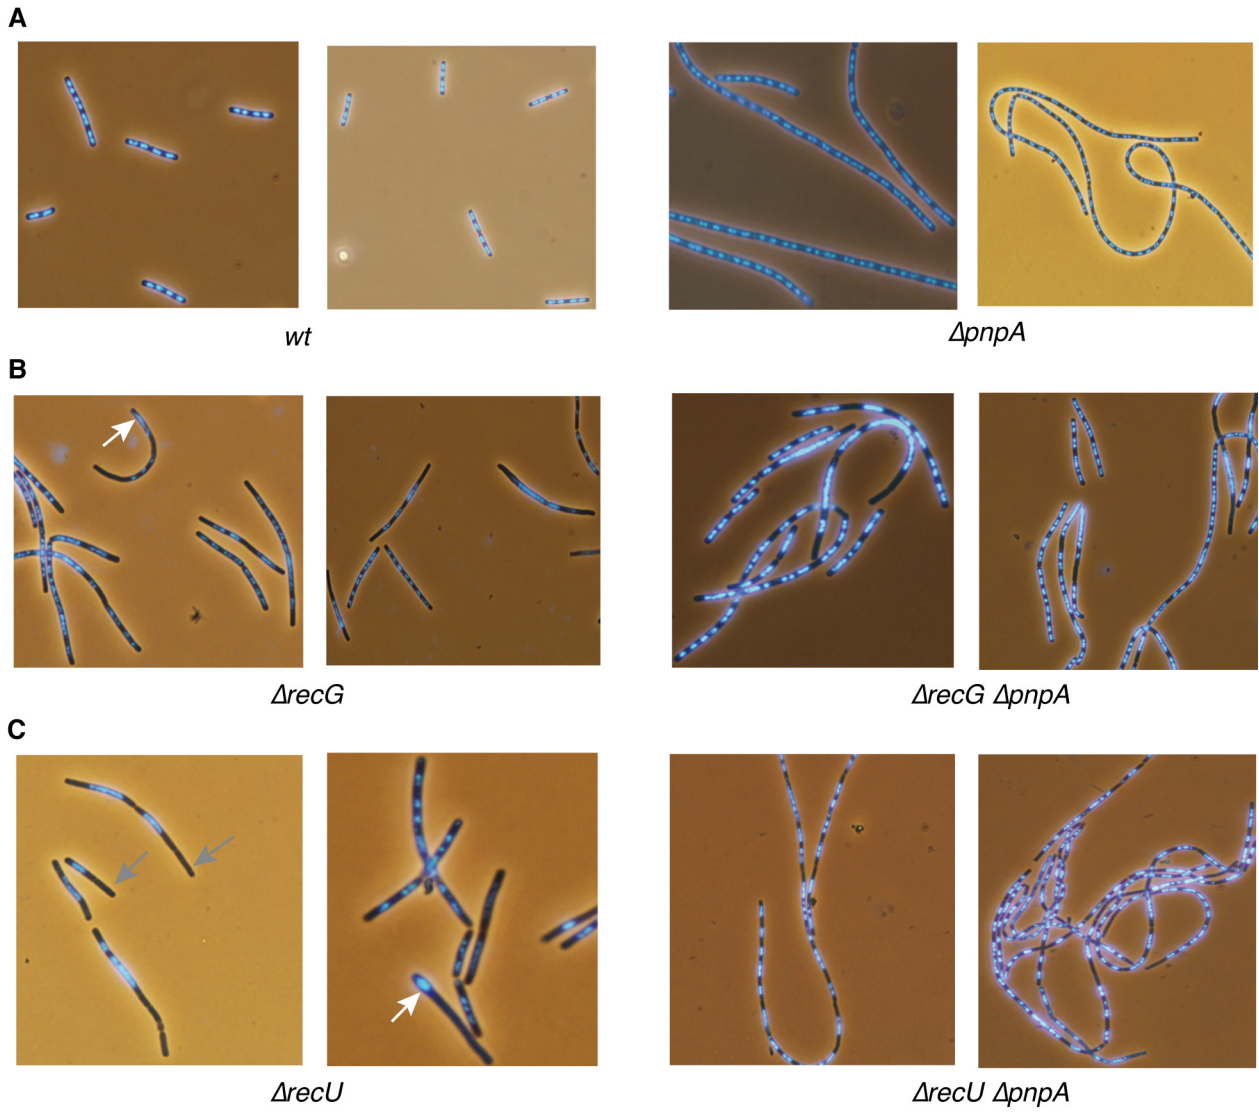

**Figure S2**



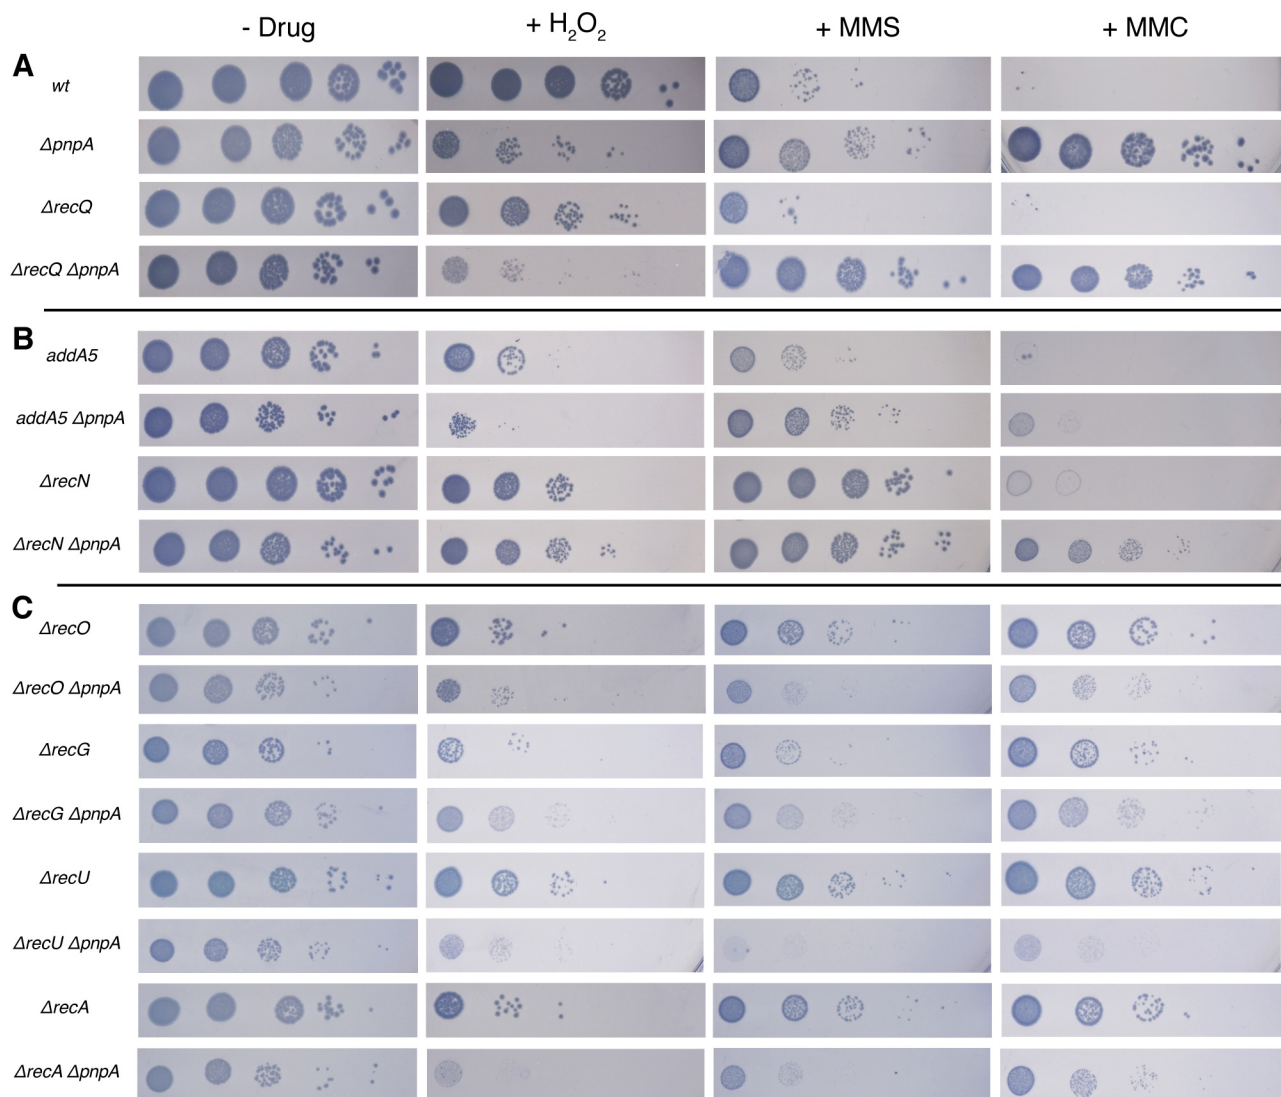

Figure S3

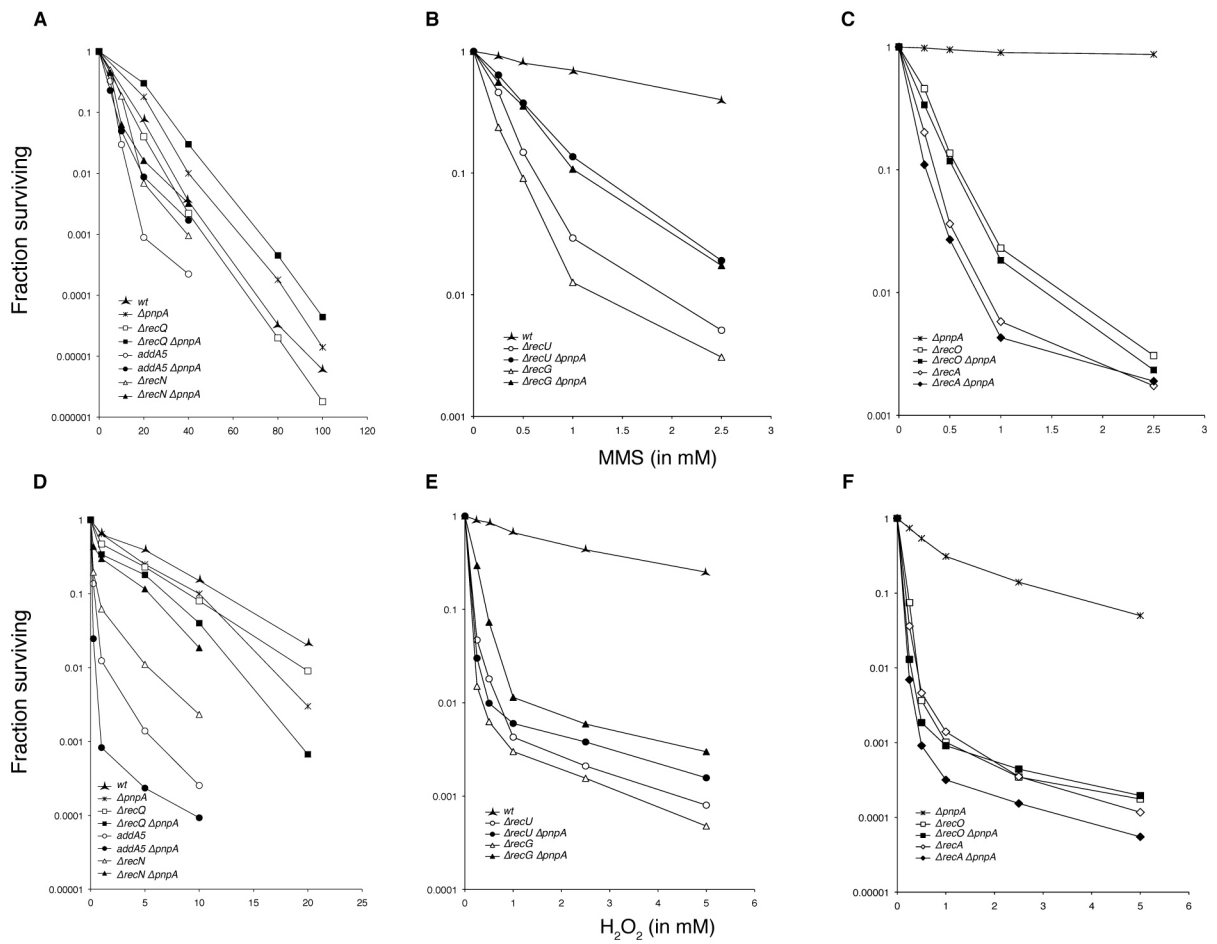

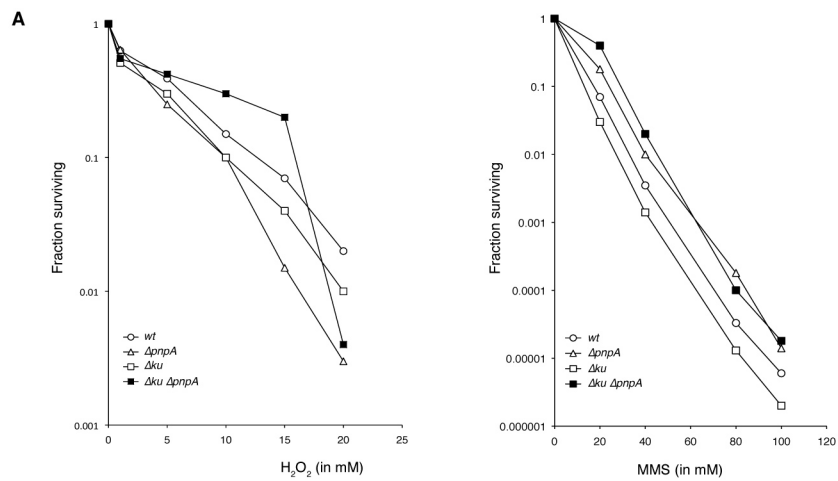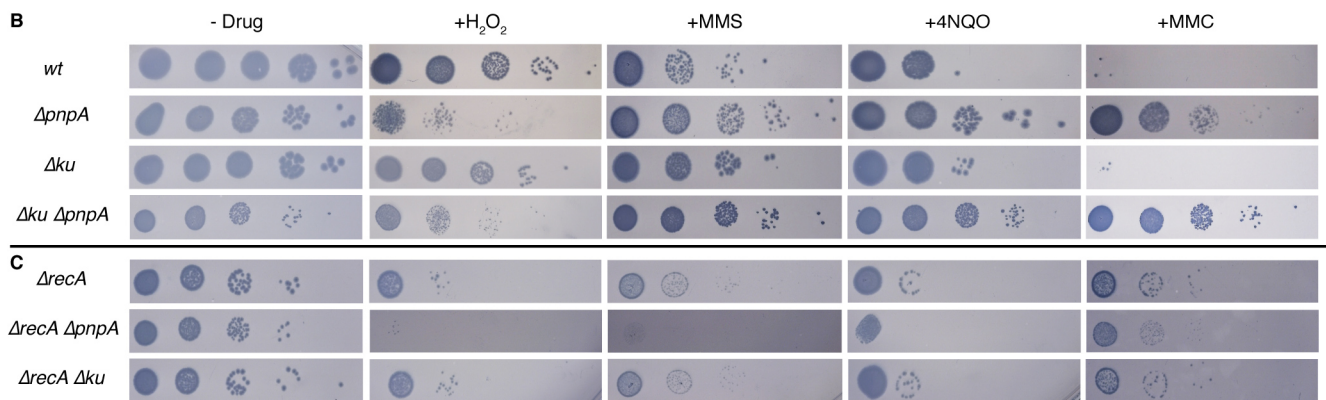

Figure S5
